# Supplementary material for: Vinblastine/Methotrexate for Debilitating and Progressive Plexiform Neurofibroma in Children and Young Adults with Neurofibromatosis Type 1: A Phase 2 Study
Source: MDPI journal article supplement (doi:10.3390/cancers15092621), 2023-05-05
Supplement: s1 [file s1]

**Table S1.** Comparison of tumor status at end of therapy by 2-dimensional and 3-dimensional imaging analyses, by participant.

| End of Treatment<br>Imaging Outcomes (N=15) |                     | 3-Dimensional MRI      |                   |
|---------------------------------------------|---------------------|------------------------|-------------------|
|                                             |                     | Progressive<br>Disease | Stable<br>Disease |
| 2-Dimensional MRI                           | Progressive Disease | 2                      | 0                 |
|                                             | Stable Disease      | 5                      | 8                 |

Abbreviations: N, number; MRI, magnetic resonance imaging
